# Supplementary material for: Pre-selection of fibroblast subsets prompts prevascularization of tissue engineered skin analogues
Source: Royal Society of Chemistry journal article supplement (doi:10.1039/d2bm02022j), 2023-01-01
Supplement: d2bm02022j1.pdf [file d2bm02022j1.pdf]

## Pre-selection of fibroblasts subsets prompt prevascularization of tissue engineered skin analogues

Helena R. Moreira<sup>1,2</sup>, Mariana T. Cerqueira<sup>1,2</sup>, Lucília P. da Silva<sup>1,2</sup>, Joana Pires<sup>1,2</sup>, Marian Jarnalo<sup>3,4</sup>, Ricardo Horta<sup>3,4</sup>, Rui Reis<sup>1,2</sup>, Alexandra P. Marques<sup>1,2,\*</sup>

<sup>1</sup> 3B's Research Group, I3Bs – Research Institute on Biomaterials, Biodegradables and Biomimetics, University of Minho, Headquarters of the European Institute of Excellence on Tissue Engineering and Regenerative Medicine

<sup>2</sup> ICVS/3B's – PT Government Associate Laboratory, Braga/Guimarães 4805-017, Portugal

<sup>3</sup> Department of Plastic and Reconstructive Surgery, and Burn Unity, Centro Hospitalar de São João, Porto, Portugal

<sup>4</sup> Faculty of Medicine - University of Porto, Portugal

\* Corresponding author: apmarques@i3bs.uminho.pt apmarques@i3bs.uminho.pt

## Supplementary information

**Supplementary Table 1** – Fluorochrome-labeled antibodies used for cell sorting

| Antibody          | Brand               | Ref        | Host |
|-------------------|---------------------|------------|------|
| CD324 PerCP-Cy5.5 | BD Biosciences, USA | 563573     | Ms   |
| CD45 PE-Cy7       | BD Biosciences, USA | 557748     | Ms   |
| CD31 APC-Cy7      | BD Biosciences, USA | 563653     | Ms   |
| CD90 FITC         | eBiosciences, USA   | 11-0909-42 | Dk   |
| CD39 PE           | BD Biosciences, USA | 555464     | Ms   |
| CD26 PE-CF594     | BD Biosciences, USA | 565158     | Ms   |
| CD36 APC          | BD Biosciences, USA | 550956     | Dk   |

Legend: Dk – donkey, Ms – mouse

**Supplementary Table 2** – Fluorochrome-labeled antibodies used for flow cytometry

| Antibody      | Brand               | Ref           | Host |
|---------------|---------------------|---------------|------|
| CD39 PE       | BD Biosciences, USA | 555464        | Ms   |
| CD26 PE-CF594 | BD Biosciences, USA | 565158        | Ms   |
| CD36 APC      | BD Biosciences, USA | 550956        | Dk   |
| PDNP PE       | Biolegend, USA      | 337003        | Rat  |
| TGM2 FITC     | Bioss, USA          | bs-8589R-FITC | Rb   |

Legend: Dk – donkey, Ms – mouse, PDNP – podoplanin, Rb – rabbit, TGM2 – transglutaminase-2

**Supplementary Table 3 – Immunolabelling antibodies**

|                      | Antibody                    | Brand           | Ref      | Host | Dilution |
|----------------------|-----------------------------|-----------------|----------|------|----------|
| Primary antibodies   | Podoplanin                  | Abcam, UK       | ab10288  | Ms   | 1:250    |
|                      | Transglutaminase-2          | Abcam, UK       | ab421    | Rb   | 1:75     |
|                      | FAP                         | Abcam, UK       | ab53066  | Rb   | 1:100    |
|                      | CD31                        | Dako, Denmark   | M0823    | Ms   | 1:30     |
|                      | Collagen type I             | Abcam, UK       | ab34710  | Rb   | 1:100    |
|                      | Fibronectin                 | Abcam, UK       | ab2413   | Rb   | 1:100    |
|                      | Laminin                     | Abcam, UK       | ab11575  | Rb   | 1:30     |
|                      | Keratin 14                  | Covance, USA    | PRB-160P | Rb   | 1:800    |
| Secondary antibodies | Alexa fluor 488 anti-rabbit | Invitrogen, USA | A-11008  | Gt   | 1:500    |
|                      | Alexa fluor 594 anti-mouse  | Invitrogen, USA | A-11032  | Gt   | 1:500    |
|                      | Alexa fluor 594 anti-rabbit | Invitrogen, USA | A-11012  | Gt   | 1:500    |

Legend: FAP – fibroblast activation protein, Gt – goat, Ms – mouse, Rb – rabbit

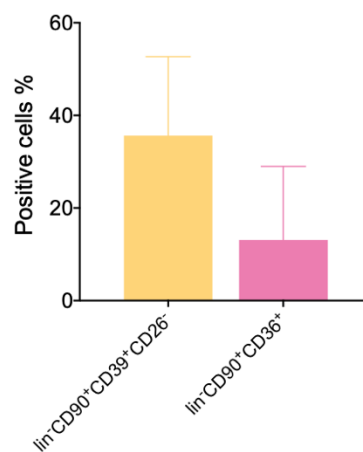

**Supplementary Figure 1 – Percentage of papillary and reticular fibroblasts present in the lin<sup>+</sup>CD90<sup>+</sup> fraction, N=6.**

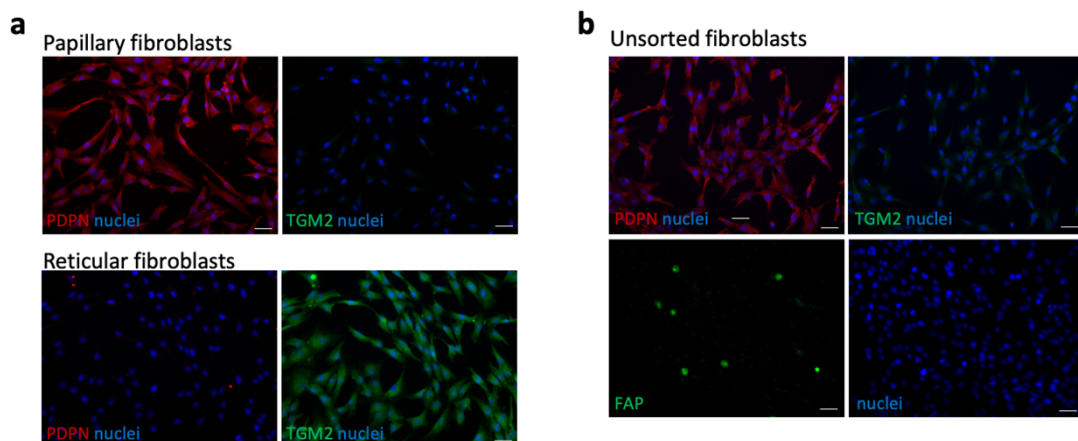

**Supplementary Figure 2 – Individual immunocytochemistry images of the expression of podoplanin (PDNP), transglutaminase-2 (TGM2) and fibroblast activated protein (FAP) by a papillary and reticular and b unsorted fibroblasts populations after isolation. Scale bar = 100  $\mu$ m. Nuclei were counterstained with DAPI.**

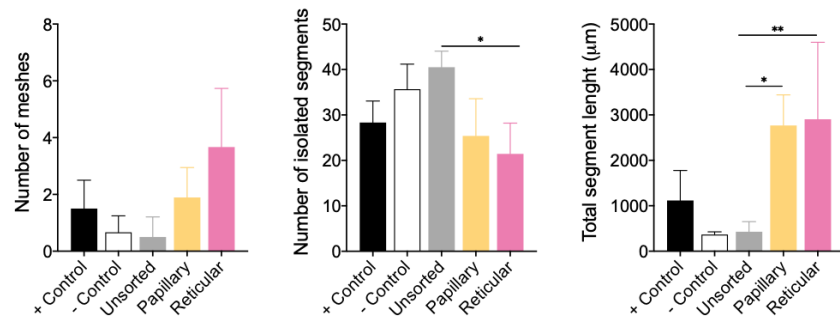

**Supplementary Figure 3** – Quantification of the number of meshes, isolated segments and total segment length of the tubular-like structures formed on Matrigel by hDMECs cultured with conditioned obtained from unsorted, papillary and reticular fibroblasts after 24 h of culture. Quantitative results are expressed as the mean  $\pm$  standard deviation where  $n = 3$ , \*  $p < 0.05$ , \*\*  $p < 0.01$ , one-way ANOVA with Tukey multiple comparison post-test.

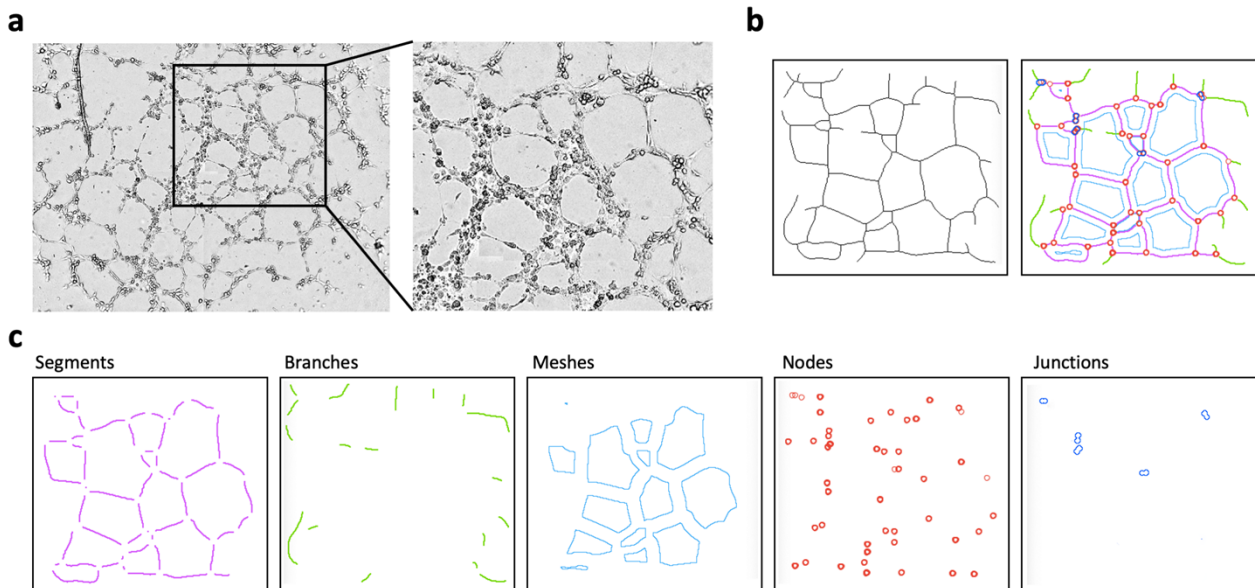

**Supplementary Figure 4** – Schematic representation of the measurements obtained from the Angiogenesis Analyzer in ImageJ. a Initial image used for the measurements. b Skeleton of the image. c Detection of segments (purple) – lines connected by two nodes, branches (green) – lines connected by a node, meshes (light blue) – closed areas surrounded by segments, nodes (red) – minimum structure allowing a bifurcation, and junctions (dark blue) – four or more connected segments.

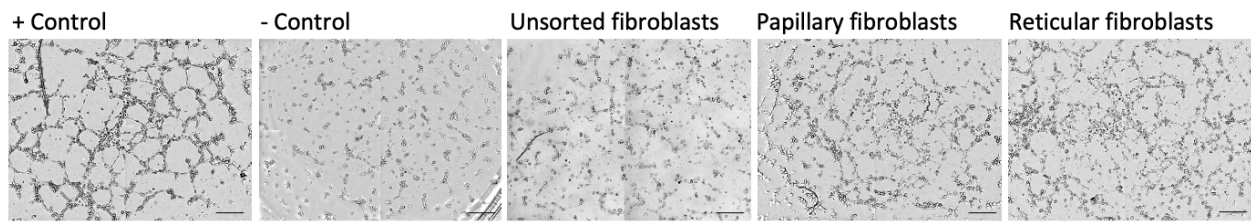

**Supplementary Figure 5** – Tubular-like structures formation after 8 h by hDMECs cultured on matrigel with conditioned media obtained from unsorted, papillary and reticular fibroblasts. Controls were set with VEGF-containing medium (+ Control) and with  $\alpha$ -MEM (- Control). Scale bar = 100  $\mu$ m.

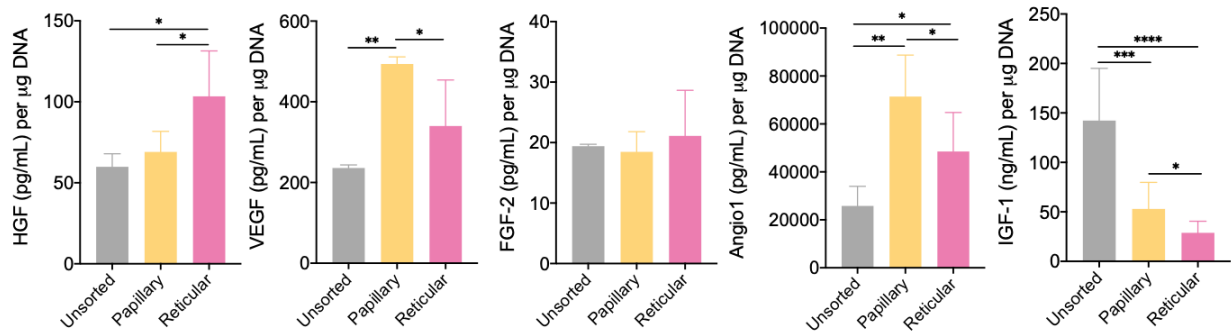

**Supplementary Figure 6** – Amount of growth factors secreted by unsorted, papillary and reticular fibroblasts as quantified in the conditioned media normalized with their respective DNA amount. Quantitative results are expressed as the mean  $\pm$  standard deviation where  $n = 3$ , \*  $p < 0.05$ , \*\*  $p < 0.01$ , \*\*\*  $p < 0.001$ , \*\*\*\*  $p < 0.0001$ , one-way ANOVA with Tukey multiple comparison post-test.

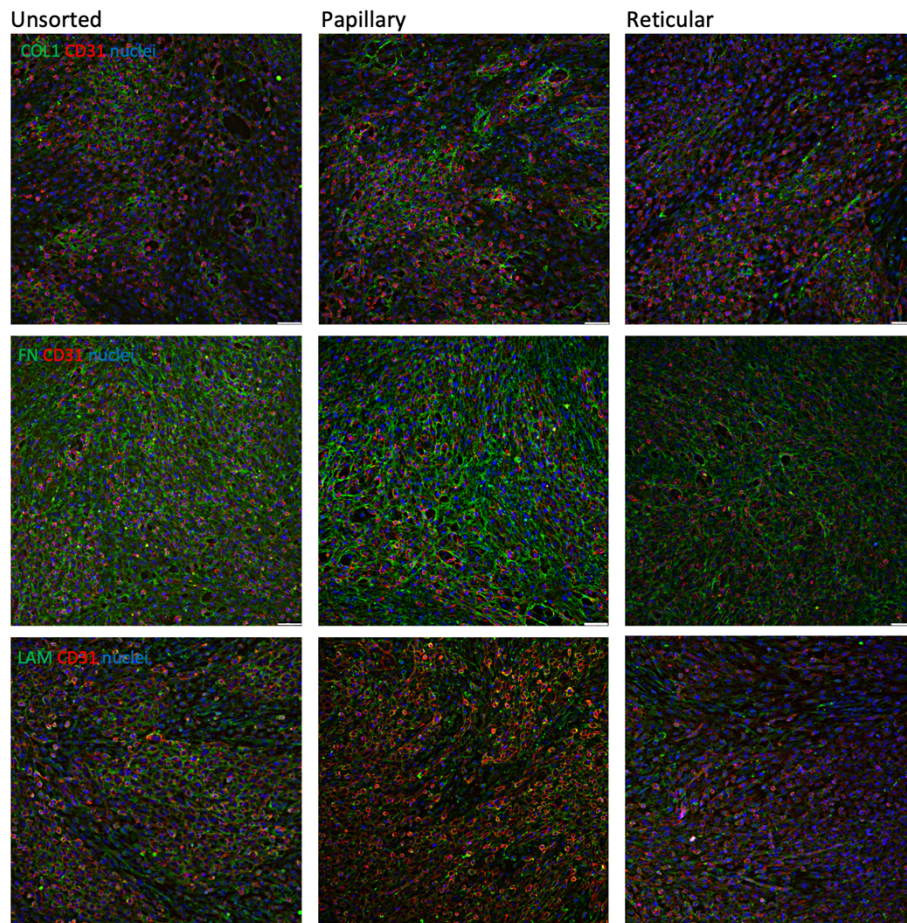

**Supplementary Figure 7** – Representative merged immunocytochemistry images of the expression of collagen type I (COL1), fibronectin (FN) and laminin (LAM) by the subpopulations of fibroblasts with the organization of CD31<sup>+</sup> hDMECs on the matrix of the different fibroblasts' subpopulations. Nuclei were counterstained with DAPI. Scale bar = 100  $\mu$ m.

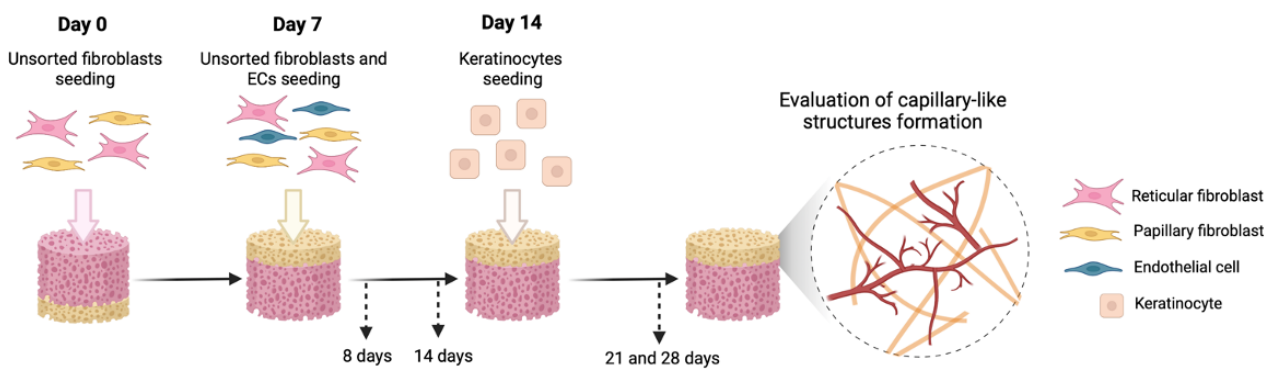

**Supplementary Figure 8** – Schematic representation of the unsorted fibroblasts, endothelial cells (ECs) and keratinocytes seeding strategy on the bilayer structure.

Day 8

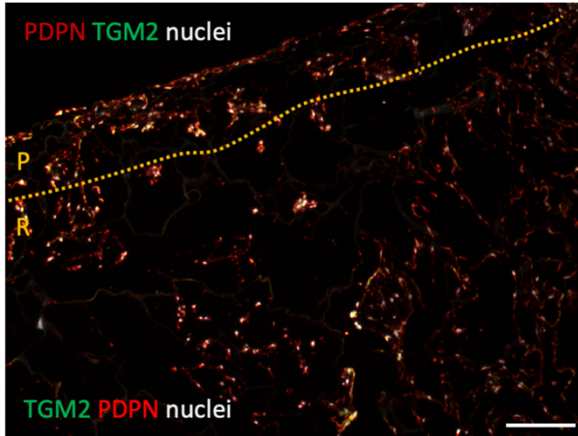

Day 28

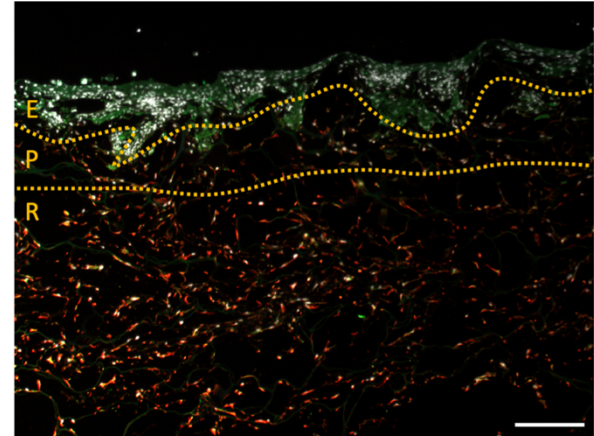

**Supplementary Figure 9** – Merged immunohistochemistry images of the expression of podoplanin (PDPN) and transglutaminase-2 (TGM2) in the bilayered structures with pre-selected fibroblasts at days 8 and 28. Nuclei were counterstained with DAPI. Scale bar = 200  $\mu$ m. E – epidermis, P – papillary-like dermis, R – reticular-like dermis.
